# Supplementary material
Source: publisher figshare collection journal article supplement (https://frontiersin.figshare.com/ndownloader/files/14073155)
Supplement: Supplementary file 1 [file 14073155]

Supplemental material Table 1: Share of fatty acids (mg g-1 total fatty acids) in the digestive gland and muscle of the six different treatments in the experimental trial. Different lower-case letters indicate significant differences between samples (p<0.05). Differences in the high algae groups are annotated with the letters a, b and c, and differences in the low algae group are annotated with the letters x, y and z. Differences between high and low algae diets are denoted with a star *. One star indicates p < 0.05 and two start indicate p < 0.001. LC-PUFA means long chain poly unsaturated fatty acids.

| Digestive gland | High algae concentration | | | | | | | | | | | | | | | | | Low algae concentration | | | | | | | | | | | | | | | | |
| --- | --- | --- | --- | --- | --- | --- | --- | --- | --- | --- | --- | --- | --- | --- | --- | --- | --- | --- | --- | --- | --- | --- | --- | --- | --- | --- | --- | --- | --- | --- | --- | --- | --- | --- |
| mg g-1 TFA | Control | | | | | Salmon feed | | | | | | Salmon faeces | | | | | | Control | | | | | | Salmon feed | | | | | | Salmon faeces | | | | |
| C14:0 | **15.7 | ± | 0.4 | | | **15.3 | | ± | | 0.3 | | **16.8 | | ± | | 0.2 | | 10.0 | | ± | | 0.3x | | 11.3 | | ± | | 0.7xy | | 12.3 | ± | | 0.2y | |
| C16:0 | 80.6 | ± | 0.7 | | | **80.0 | | ± | | 0.2 | | **92.4 | | ± | | 2.3 | | 86.7 | | ± | | 1.6x | | 102.8 | | ± | | 7.9y | | 119.2 | ± | | 2.3z | |
| C18:0 | **42.0 | ± | 1.5 | | | **44.2 | | ± | | 3.5 | | **44.5 | | ± | | 2.0 | | 88.3 | | ± | | 1.4 | | 88.8 | | ± | | 0.5 | | 95.1 | ± | | 1.5 | |
| Total Saturated FA | **138.5 | ± | 2.0a | | | **139.5 | | ± | | 5.9a | | **153.7 | | ± | | 6.7b | | 188.1 | | ± | | 5.8x | | 204.2 | | ± | | 12.1y | | 227.0 | ± | | 6.0z | |
|  |  |  |  | | |  | |  | |  | |  | |  | |  | |  | |  | |  | |  | |  | |  | |  |  | |  | |
| C16:1n7 | **34.3 | ± | 0.9 | | | **32.9 | | ± | | 1.6 | | **35.1 | | ± | | 0.9 | | 18.4 | | ± | | 0.5 | | 17.7 | | ± | | 0.7 | | 15.6 | ± | | 1.4 | |
| C18:1n9 | 9.7 | ± | 0.2a | | | *14.2 | | ± | | 0.4b | | *15.7 | | ± | | 0.4b | | 10.0 | | ± | | 0.9x | | 22.0 | | ± | | 3.3y | | 22.0 | ± | | 0.5y | |
| C18:1n7 | **45.8 | ± | 1.6 | | | **46.0 | | ± | | 1.3 | | **45.5 | | ± | | 0.5 | | 23.5 | | ± | | 0.5 | | 25.1 | | ± | | 1.1 | | 24.2 | ± | | 0.4 | |
| C20:1n9 | **3.2 | ± | 0.1a | | | **4.9 | | ± | | 0.2b | | **4.5 | | ± | | 0.2b | | 10.5 | | ± | | 0.5x | | 13.0 | | ± | | 0.9y | | 13.1 | ± | | 0.7y | |
| C22:1n11 | **9.8 | ± | 0.2 | | | **9.9 | | ± | | 0.4 | | **8.9 | | ± | | 0.2 | | 5.5 | | ± | | 0.5 | | 5.0 | | ± | | 0.5 | | 4.4 | ± | | 0.3 | |
| Total monoenes FA | **102.8 | ± | 4.3 | | | **108.5 | | ± | | 4.5 | | **109.8 | | ± | | 2.8 | | 67.9 | | ± | | 2.5x | | 82.7 | | ± | | 4.3y | | 79.3 | ± | | 3.3y | |
|  |  |  |  | | |  | |  | |  | |  | |  | |  | |  | |  | |  | |  | |  | |  | |  |  | |  | |
| C18:2n6 | **87.8 | ± | 5.6 | | | **85.8 | | ± | | 3.5 | | **85.3 | | ± | | 2.9 | | 14.3 | | ± | | 1.1 | | 17.0 | | ± | | 0.8 | | 15.4 | ± | | 0.4 | |
| C20:2n6 | **15.3 | ± | 0.9 | | | **15.1 | | ± | | 0.5 | | **15.5 | | ± | | 0.3 | | 11.9 | | ± | | 0.2 | | 11.4 | | ± | | 0.6 | | 10.2 | ± | | 0.1 | |
| C20:4n6 | **40.0 | ± | 1.4 | | | *41.4 | | ± | | 1.5 | | **37.0 | | ± | | 0.9 | | 52.9 | | ± | | 0.4 | | 49.1 | | ± | | 2.6 | | 49.0 | ± | | 0.2 | |
| C22:5n6 | **4.7 | ± | 0.0 | | | **5.3 | | ± | | 0.3 | | **4.7 | | ± | | 0.2 | | 8.5 | | ± | | 0.1 | | 7.8 | | ± | | 0.4 | | 7.6 | ± | | 0.1 | |
| Total n6 FA | **156.1 | ± | 13.4 | | | **155.7 | | ± | | 4.8 | | **149.8 | | ± | | 3.5 | | 93.1 | | ± | | 1.7 | | 91.0 | | ± | | 7.1 | | 87.3 | ± | | 0.9 | |
|  |  |  |  | | |  | |  | |  | |  | |  | |  | |  | |  | |  | |  | |  | |  | |  |  | |  | |
| C18:3n3 | **107.1 | ± | 9.3 | | | **103.1 | | ± | | 7.3 | | **107.4 | | ± | | 5.1 | | 24.4 | | ± | | 1.6 | | 25.3 | | ± | | 1.2 | | 24.4 | ± | | 0.7 | |
| C18:4n3 | **94.3 | ± | 9.3 | | | **93.0 | | ± | | 6.2 | | **94.1 | | ± | | 4.5 | | 36.9 | | ± | | 1.4 | | 35.4 | | ± | | 1.3 | | 34.8 | ± | | 1.5 | |
| C20:3n3 | 2.5 | ± | 0.2 | | | *2.4 | | ± | | 0.1 | | **2.3 | | ± | | 0.1 | | 2.2 | | ± | | 0.1x | | 1.8 | | ± | | 0.1xy | | 1.6 | ± | | 0.0y | |
| C20:4n3 | 3.6 | ± | 0.4 | | | 3.5 | | ± | | 0.2 | | 3.4 | | ± | | 0.1 | | 3.5 | | ± | | 0.0 | | 3.0 | | ± | | 0.2 | | 2.9 | ± | | 0.1 | |
| C20:5n3 | *92.8 | ± | 5.8 | | | 95.7 | | ± | | 1.5 | | *88.7 | | ± | | 1.3 | | 113.3 | | ± | | 4.2 | | 104.7 | | ± | | 4.1 | | 107.1 | ± | | 1.1 | |
| C22:5n3 | **2.2 | ± | 0.2 | | | **2.6 | | ± | | 0.1 | | **2.7 | | ± | | 0.1 | | 6.9 | | ± | | 0.1 | | 6.9 | | ± | | 0.4 | | 7.1 | ± | | 0.1 | |
| C22:6n3 | **98.7 | ± | 3.3 | | | **110.1 | | ± | | 5.1 | | **106.7 | | ± | | 2.9 | | 235.8 | | ± | | 5.2 | | 222.9 | | ± | | 2.9 | | 236.5 | ± | | 2.6 | |
| Total n3 FA | 401.1 | ± | 45.7 | | | 410.4 | | ± | | 17.3 | | 405.2 | | ± | | 13.9 | | 423.0 | | ± | | 14.7 | | 400.1 | | ± | | 14.0 | | 414.4 | ± | | 5.6 | |
|  |  |  |  | | |  | |  | |  | |  | |  | |  | |  | |  | |  | |  | |  | |  | |  |  | |  | |
| Total PUFA | 557.2 | ± | 59.0 | | | *566.1 | | ± | | 21.2 | | *555.0 | | ± | | 15.5 | | 516.1 | | ± | | 15.0 | | 491.1 | | ± | | 21.0 | | 501.8 | ± | | 5.9 | |
| Total LC PUFA | **268.0 | ± | 19.0 | | | **284.1 | | ± | | 10.0 | | **268.3 | | ± | | 6.5 | | 440.5 | | ± | | 15.8 | | 407.8 | | ± | | 17.6 | | 422.0 | ± | | 5.9 | |
| n3/n6 | **2.6 | ± | 0.1 | | | **2.6 | | ± | | 0.1 | | **2.7 | | ± | | 0.1 | | 4.5 | | ± | | 0.2xy | | 4.4 | | ± | | 0.2x | | 4.7 | ± | | 0.1y | |
| DHA/EPA | **1.1 | ± | 0.1 | | | **1.2 | | ± | | 0.1 | | **1.2 | | ± | | 0.1 | | 2.1 | | ± | | 0.1 | | 2.1 | | ± | | 0.1 | | 2.2 | ± | | 0.0 | |
| EPA/ARA | 2.3 | ± | 0.2 | | | 2.3 | | ± | | 0.2 | | 2.4 | | ± | | 0.1 | | 2.1 | | ± | | 0.1 | | 2.1 | | ± | | 0.1 | | 2.2 | ± | | 0.0 | |
| Muscle | High algae concentration | | | | | | | | | | | | | | | | Low algae concentration | | | | | | | | | | | | | | | | | | |
| mg g-1 TFA | Control | | | | Salmon feed | | | | | | Salmon faeces | | | | | | Control | | | | | | Salmon feed | | | | | | Salmon faeces | | | | | | |
| C14:0 | 18.4 | ± | | 0.4 | 17.5 | | ± | | 0.4 | | 18.1 | | ± | | 0.7 | | 17.7 | | ± | | 0.3 | | 18.6 | | ± | | 0.5 | | 19.0 | | | ± | | 0.2 | |
| C16:0 | **154.1 | ± | | 2.1 | 147.8 | | ± | | 1.4 | | 154.5 | | ± | | 2.0 | | 137.0 | | ± | | 1.3x | | 147.3 | | ± | | 3.4y | | 153.2 | | | ± | | 1.4y | |
| C18:0 | *70.5 | ± | | 1.8 | *70.8 | | ± | | 1.0 | | *71.2 | | ± | | 2.0 | | 75.7 | | ± | | 0.2 | | 78.2 | | ± | | 0.0 | | 77.3 | | | ± | | 1.3 | |
| Total Saturated FA | *243.0 | ± | | 3.5 | *236.1 | | ± | | 2.4 | | 243.8 | | ± | | 7.8 | | 230.4 | | ± | | 3.2x | | 244.1 | | ± | | 6.4y | | 249.4 | | | ± | | 4.3 y | |
|  |  |  | |  |  | |  | |  | |  | |  | |  | |  | |  | |  | |  | |  | |  | |  | | |  | |  | |
| C16:1n7 | **11.2 | ± | | 0.2 | *10.3 | | ± | | 0.2 | | **12.2 | | ± | | 0.2 | | 6.4 | | ± | | 0.9 | | 7.7 | | ± | | 0.4 | | 7.4 | | | ± | | 0.3 | |
| C18:1n9 | 11.2 | ± | | 0.4a | 15.3 | | ± | | 0.5b | | 7.3 | | ± | | 1.4c | | 12.3 | | ± | | 0.4x | | 15.9 | | ± | | 1.6x | | 8.1 | | | ± | | 1.0y | |
| C18:1n7 | **33.8 | ± | | 0.5 | **33.1 | | ± | | 0.9 | | **31.4 | | ± | | 0.9 | | 22.1 | | ± | | 0.4 | | 23.7 | | ± | | 0.8 | | 21.2 | | | ± | | 0.7 | |
| C20:1n9 | 11.4 | ± | | 0.2 | **11.3 | | ± | | 0.3 | | **11.4 | | ± | | 0.2 | | 11.9 | | ± | | 0.5x | | 13.9 | | ± | | 0.2y | | 14.5 | | | ± | | 0.7y | |
| C22:1n11 | **4.8 | ± | | 0.3 | **4.9 | | ± | | 0.5 | | **5.0 | | ± | | 0.1 | | n.d. | | | | | | n.d. | | | | | | n.d. | | | | | | |
| Total monoenes FA | **72.4 | ± | | 1.4ab | **74.9 | | ± | | 2.1a | | **67.4 | | ± | | 3.8b | | 52.7 | | ± | | 1.2x | | 61.2 | | ± | | 4.8y | | 51.3 | | | ± | | 2.3x | |
|  |  |  | |  |  | |  | |  | |  | |  | |  | |  | |  | |  | |  | |  | |  | |  | | |  | |  | |
| C18:2n6 | **21.6 | ± | | 0.3 | **21.1 | | ± | | 1.1 | | **22.7 | | ± | | 0.3 | | 2.0 | | ± | | 0.5x | | 3.5 | | ± | | 1.0xy | | 5.1 | | | ± | | 0.1y | |
| C20:2n6 | **15.4 | ± | | 0.6 | **13.3 | | ± | | 0.4 | | **14.7 | | ± | | 0.9 | | 6.2 | | ± | | 0.2 | | 7.2 | | ± | | 0.1 | | 6.8 | | | ± | | 0.4 | |
| C20:3n6 | **4.6 | ± | | 0.1 | **4.2 | | ± | | 0.4 | | **5.0 | | ± | | 0.2 | | 2.4 | | ± | | 0.4 | | 2.2 | | ± | | 0.1 | | 2.1 | | | ± | | 0.2 | |
| C20:4n6 | **30.6 | ± | | 0.9 | **31.2 | | ± | | 1.0 | | **30.8 | | ± | | 0.9 | | 24.3 | | ± | | 0.5 | | 25.6 | | ± | | 0.7 | | 25.7 | | | ± | | 0.8 | |
| C22:5n6 | 7.7 | ± | | 0.1 | 6.7 | | ± | | 0.9 | | 6.1 | | ± | | 1.0 | | 7.1 | | ± | | 0.1 | | 5.7 | | ± | | 1.6 | | 5.9 | | | ± | | 1.7 | |
| Total n6 FA | **79.9 | ± | | 1.9 | **76.5 | | ± | | 3.1 | | **79.3 | | ± | | 4.2 | | 42.1 | | ± | | 1.3 | | 44.1 | | ± | | 5.4 | | 45.6 | | | ± | | 4.0 | |
|  |  |  | |  |  | |  | |  | |  | |  | |  | |  | |  | |  | |  | |  | |  | |  | | |  | |  | |
| C18:3n3 | 22.5 | ± | | 0.7 | 20.2 | | ± | | 1.0 | | 23.3 | | ± | | 0.8 | | 2.8 | | ± | | 0.2 | | 0.8 | | ± | | 0.8 | | 1.2 | | | ± | | 0.7 | |
| C18:4n3 | **32.6 | ± | | 1.7a | **27.7 | | ± | | 0.6b | | **32.2 | | ± | | 0.8a | | 12.6 | | ± | | 0.4 | | 14.3 | | ± | | 0.8 | | 14.1 | | | ± | | 0.5 | |
| C20:3n3 | *1.2 | ± | | 0.3 | *1.2 | | ± | | 0.1 | | *1.4 | | ± | | 0.1 | | 0.6 | | ± | | 0.1 | | 0.6 | | ± | | 0.0 | | 0.6 | | | ± | | 0.1 | |
| C20:4n3 | **5.3 | ± | | 0.2a | 4.2 | | ± | | 0.2b | | *4.9 | | ± | | 0.3ab | | 3.7 | | ± | | 0.1 | | 3.7 | | ± | | 0.3 | | 3.6 | | | ± | | 0.3 | |
| C20:5n3 | *124.3 | ± | | 1.1a | 116.4 | | ± | | 1.0b | | 124.3 | | ± | | 2.0a | | 114.0 | | ± | | 3.0 | | 119.8 | | ± | | 2.3 | | 120.3 | | | ± | | 1.4 | |
| C22:5n3 | 12.6 | ± | | 0.6 | *11.5 | | ± | | 1.2 | | 11.8 | | ± | | 0.6 | | 14.0 | | ± | | 0.5 | | 13.8 | | ± | | 0.7 | | 13.7 | | | ± | | 0.2 | |
| C22:6n3 | **339.0 | ± | | 2.7 | **318.4 | | ± | | 6.3 | | **334.8 | | ± | | 6.2 | | 388.6 | | ± | | 3.6 | | 399.2 | | ± | | 16.1 | | 416.2 | | | ± | | 1.9 | |
| Total n3 FA | **537.5 | ± | | 7.7a | **499.6 | | ± | | 6.0b | | **532.7 | | ± | | 9.3a | | 536.2 | | ± | | 7.2 | | 552.3 | | ± | | 32.8 | | 569.6 | | | ± | | 5.9 | |
|  |  |  | |  |  | |  | |  | |  | |  | |  | |  | |  | |  | |  | |  | |  | |  | | |  | |  | |
| Total PUFA | **617.4 | ± | | 7.7a | **576.2 | | ± | | 3.0b | | **612.0 | | ± | | 10.8a | | 578.3 | | ± | | 6.0 | | 596.4 | | ± | | 31.9 | | 615.2 | | | ± | | 3.8 | |
| Total LC PUFA | *540.8 | ± | | 4.2a | 507.2 | | ± | | 7.0b | | 533.7 | | ± | | 12.8ab | | 560.9 | | ± | | 6.1 | | 577.8 | | ± | | 32.9 | | 594.9 | | | ± | | 2.2 | |
| n3/n6 | **67.3 | ± | | 2.0 | **65.4 | | ± | | 3.3 | | **67.3 | | ± | | 3.6 | | 127.6 | | ± | | 5.7 | | 126.8 | | ± | | 20.0 | | 125.7 | | | ± | | 12.4 | |
| DHA/EPA | **27.3 | ± | | 0.6 | **27.4 | | ± | | 1.1 | | **27.0 | | ± | | 1.2 | | 34.1 | | ± | | 1.8 | | 33.3 | | ± | | 1.5 | | 34.6 | | | ± | | 0.4 | |
| EPA/ARA | *40.7 | ± | | 2.5 | **37.4 | | ± | | 2.2 | | *40.4 | | ± | | 2.8 | | 47.0 | | ± | | 3.6 | | 46.9 | | ± | | 3.0 | | 46.9 | | | ± | | 3.0 | |
